# Supplementary material for: Primary emissions versus secondary formation of fine particulate matter in the top polluted city, Shijiazhuang, in North China
Source: Copernicus journal article supplement (doi:10.5194/acp-2018-760), 2018-07-26
Supplement: Supplementary file 1 [file acp-2018-760-supplement.pdf]

1 **Supplementary Information for**

2 Primary emissions versus secondary formation of fine particulate matter in the top  
3 polluted city, Shijiazhuang, in North China

4 Ru-Jin Huang<sup>1</sup>, Yichen Wang<sup>1</sup>, Junji Cao<sup>1</sup>, Chunshui Lin<sup>1,2</sup>, Jing Duan<sup>1</sup>, Qi Chen<sup>3</sup>, Yongjie Li<sup>4</sup>,  
5 Yifang Gu<sup>1</sup>, Jin Yan<sup>1</sup>, Wei Xu<sup>1,2</sup>, Roman Fröhlich<sup>5</sup>, Francesco Canonaco<sup>5</sup>, Carlo Bozzetti<sup>5</sup>,  
6 Jurgita Ovadnevaite<sup>2</sup>, Darius Ceburnis<sup>2</sup>, Manjula R. Canagaratna<sup>6</sup>, John Jayne<sup>6</sup>, Douglas R.  
7 Worsnop<sup>6</sup>, Imad El-Haddad<sup>5</sup>, André S. H. Prévôt<sup>5</sup>, Colin D. O'Dowd<sup>2</sup>

8 <sup>1</sup>Key Laboratory of Aerosol Chemistry & Physics, State Key Laboratory of Loess and  
9 Quaternary Geology, Institute of Earth Environment, Chinese Academy of Sciences, Xi'an  
10 710061, China

11 <sup>2</sup>School of Physics and Centre for Climate and Air Pollution Studies, National University of  
12 Ireland Galway, Galway, Ireland

13 <sup>3</sup>State Key Joint Laboratory of Environmental Simulation and Pollution Control, College of  
14 Environmental Sciences and Engineering, Peking University, Beijing, China

15 <sup>4</sup>Department of Civil and Environmental Engineering, Faculty of Science and Technology,  
16 University of Macau, Taipa, Macau, China

17 <sup>5</sup>Laboratory of Atmospheric Chemistry, Paul Scherrer Institute (PSI), 5232 Villigen, Switzerl  
18 and

19 <sup>6</sup>Aerodyne Research, Inc., Billerica, MA, USA

20 *Correspondence to:* R.-J. Huang ([rujin.huang@ieecas.cn](mailto:rujin.huang@ieecas.cn))

21

22

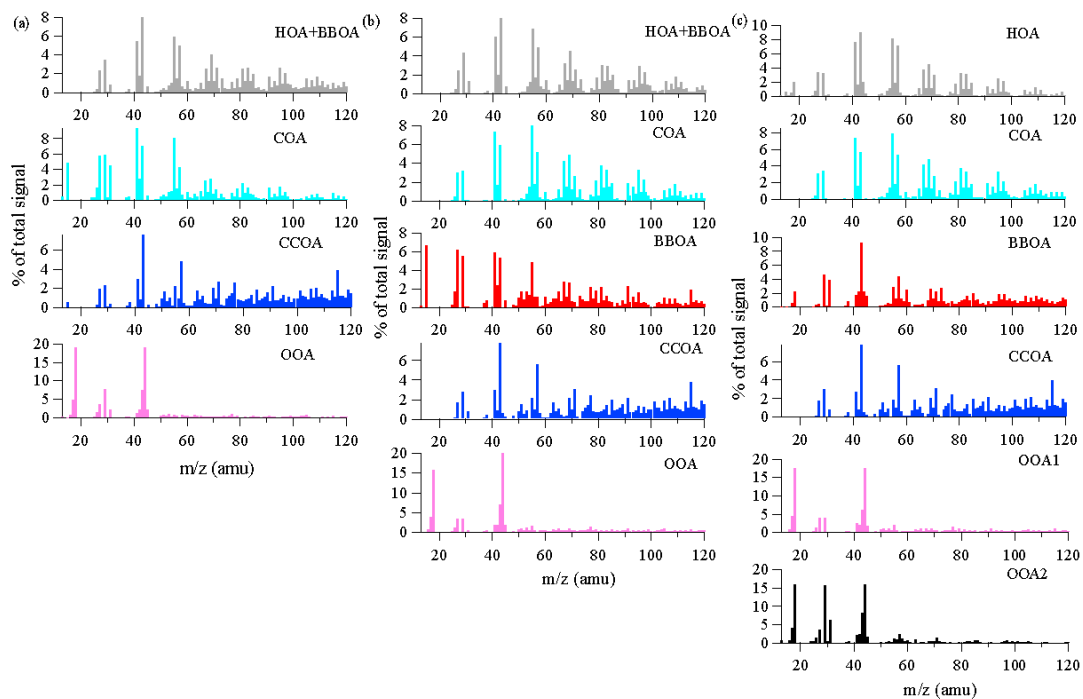

1

2 Fig. S1. PMF profiles of OA sources for 4-, 5-, and 6-factor solutions.

3

4

5

6

7

8

9

10

11

12

13

14

15

16

17

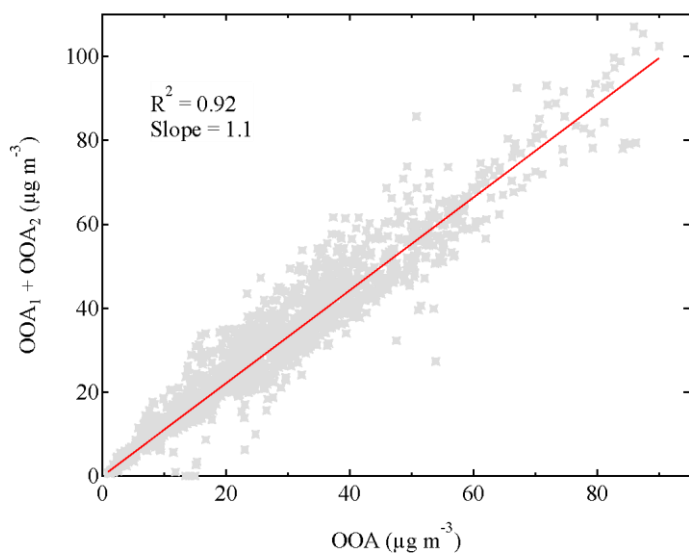

1

2 Fig. S2. Scattering plot of  $OOA_1+OOA_2$  in the 6-factor solution vs OOA in the 5-factor solution.

3

4 Note: The resolved two secondary factors in the 6-factor solution, referred to as “ $OOA_1$ ” and  
5 “ $OOA_2$ ”, have the similar contributions from oxygenated fragment-related m/z (m/z 44) and the  
6 strong correlation with each other ( $R^2 = 0.72$ ). The sum of the contributions of  $OOA_1$  and  $OOA_2$   
7 matches the OOA contribution from 5-factor solution ( $R^2 = 0.92$  and slope = 1.1).

8

9

10

11

12

13

14

15

16

17

18

19

20

21

22

23

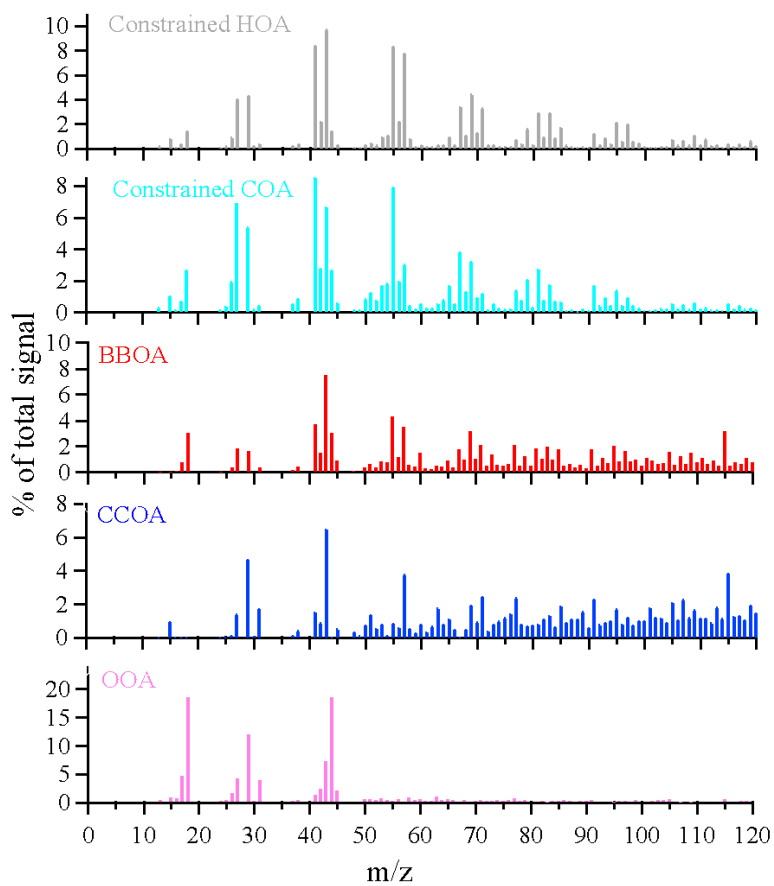

1  
 2 Fig. S3. ME-2 profiles of OA sources. The COA profile is from that of Crippa et al. (2013), and the  
 3 HOA profile is from that of Ng et al. (2011b). The others are unconstrained factors.

4  
 5  
 6  
 7

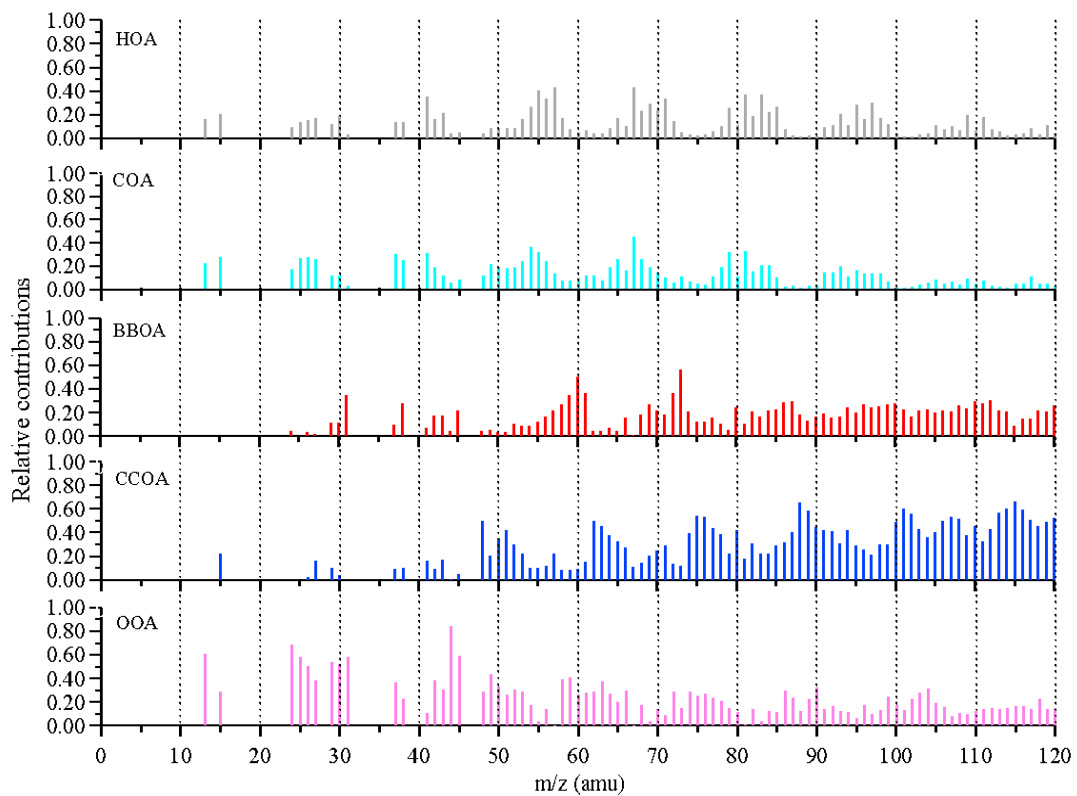

1  
2  
3  
4  
5  
6  
7  
8  
9

Fig. S4. The relative contributions of OA factors to the  $m/z$ 's.

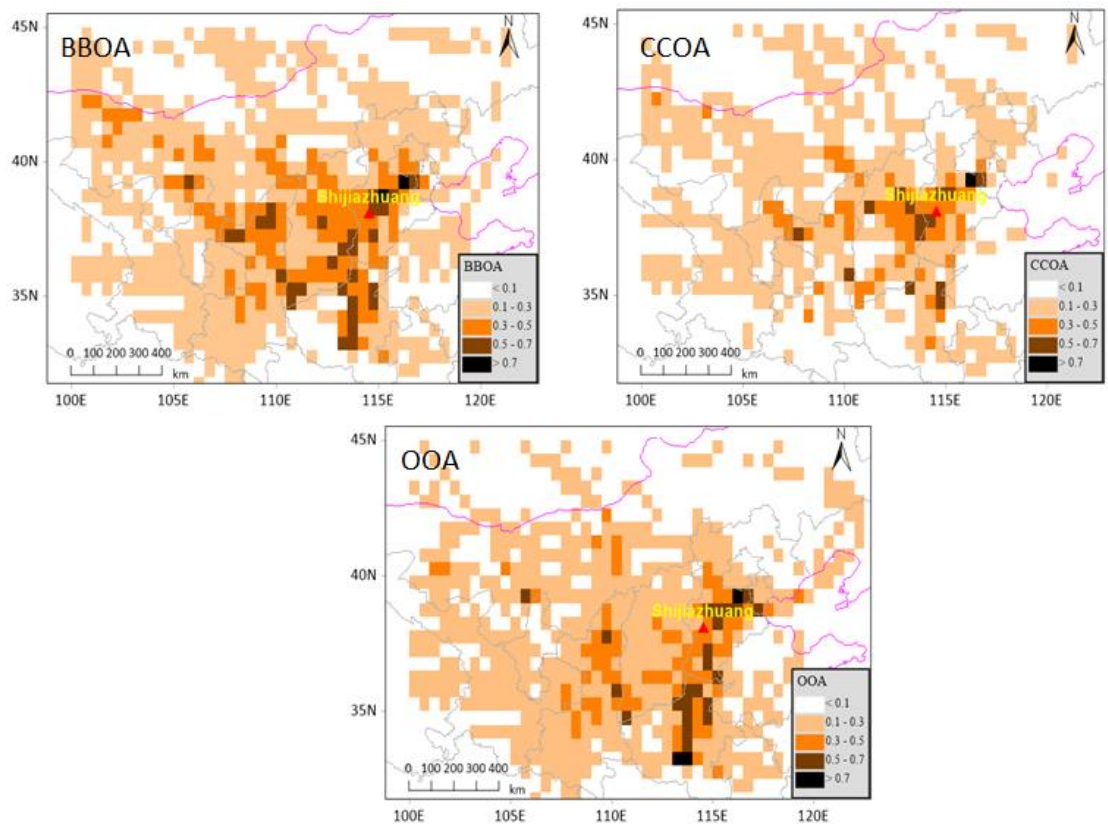

1  
 2 Fig. S5. The maps of potential source contribution function (PSCF) analysis for BBOA, CCOA, and  
 3 OOA.
